1

2

## **Cation-chloride cotransporters and the polarity of GABA signaling**

3

### **in mouse hippocampal parvalbumin interneurons**

4

5 Yo Otsu<sup>1,2,3,4</sup>, Florian Donneger<sup>1,2,3</sup>, Eric J Schwartz<sup>1,2,3</sup> and Jean Christophe Poncer<sup>1,2,3\*</sup>

6

7 <sup>1</sup> Inserm UMR-S 1270, 75005 Paris, France.; <sup>2</sup> Sorbonne Université, F75005, Paris, France ;

8 <sup>3</sup> Institut du Fer à Moulin, F75005, Paris, France.

9 <sup>4</sup> Present address: Pain Management Research Institute, Kolling Institute of Medical  
10 Research, Northern Clinical School, The University of Sydney and Royal North Shore Hospital,  
11 St. Leonards, New South Wales, Australia

12

13 Running title: GABA signaling in hippocampal parvalbumin interneurons

14 Keywords: synaptic transmission, GABA, KCC2, chloride, transporters, hippocampus

15 Category: Research paper

16

17 \* Correspondence should be addressed to Jean Christophe Poncer:

18 INSERM UMR-S 1270

19 17 rue du Fer à Moulin

20 75005 Paris, France

21 Tel. +33 1 45 87 61 18

22 E-mail : [jean-christophe.poncer@inserm.fr](mailto:jean-christophe.poncer@inserm.fr)

23 Key point summary

- 24       • Cation-chloride cotransporters (CCCs) play a critical role in controlling the efficacy  
25       and polarity of GABAA receptor (GABAAR)-mediated transmission in the brain, yet  
26       their expression and function in GABAergic interneurons has been overlooked.
- 27       • We compared the polarity of GABA signaling and the function of CCCs in mouse  
28       hippocampal pyramidal neurons and parvalbumin-expressing interneurons.
- 29       • Under resting conditions, GABAAR activation was mostly depolarizing and yet  
30       inhibitory in both cell types. KCC2 blockade further depolarized the reversal potential  
31       of GABAAR-mediated currents often above action potential threshold.
- 32       • However, during repetitive GABAAR activation, the postsynaptic response declined  
33       independently of the ion flux direction or KCC2 function, suggesting intracellular  
34       chloride buildup is not responsible for this form of plasticity.
- 35       • Our data demonstrate similar mechanisms of chloride regulation in mouse  
36       hippocampal pyramidal neurons and parvalbumin interneurons.

37

38 **Abstract**

39 Transmembrane chloride gradients govern the efficacy and polarity of GABA signaling in  
40 neurons and are usually maintained by the activity of cation chloride cotransporters, such as  
41 KCC2 and NKCC1. Whereas their role is well established in cortical principal neurons, it  
42 remains poorly documented in GABAergic interneurons. We used complementary  
43 electrophysiological approaches to compare the effects of GABAAR activation in adult mouse  
44 hippocampal parvalbumin interneurons (PV INs) and pyramidal cells (PCs). Loose cell  
45 attached, tight-seal and gramicidin-perforated patch recordings all show GABAAR-mediated  
46 transmission is slightly depolarizing and yet inhibitory in both PV INs and PCs. Focal GABA  
47 uncaging in whole-cell recordings reveal that KCC2 and NKCC1 are functional in both PV INs  
48 and PCs but differentially contribute to transmembrane chloride gradients in their soma and  
49 dendrites. Blocking KCC2 function depolarizes the reversal potential of GABAAR-mediated  
50 currents in PV INs and PCs, often beyond firing threshold, showing KCC2 is essential to  
51 maintain the inhibitory effect of GABAARs. Finally, we show that repetitive 10 Hz activation  
52 of GABAARs in both PV INs and PCs leads to a progressive decline of the postsynaptic  
53 response independently of the ion flux direction or KCC2 function. This suggests  
54 intraneuronal chloride buildup may not predominantly contribute to activity-dependent  
55 plasticity of GABAergic synapses in this frequency range. Altogether our data demonstrate  
56 similar mechanisms of chloride regulation in mouse hippocampal PV INs and PCs and suggest  
57 KCC2 downregulation in the pathology may affect the valence of GABA signaling in both cell  
58 types.

59

60

## 61 Introduction

62 Information representation and processing in the cerebral cortex relies on the dynamic  
63 interaction between ensembles of glutamatergic principal neurons and local, highly  
64 diversified GABAergic interneurons (Buzsaki, 2010). These interneurons mediate  
65 feedforward and/or feedback inhibition onto principal cells (PCs) and thereby control their  
66 coordinated activity (Klausberger & Somogyi, 2008). In particular, parvalbumin-expressing  
67 interneurons (PV INs), which receive excitatory inputs from both local and distant PCs, in  
68 turn provide them with fast perisomatic inhibition (Hu *et al.*, 2014). Fast inhibitory signaling  
69 by PV INs controls the timing of principal cell activity (Pouille & Scanziani, 2001) and plays a  
70 major role in the generation of rhythmic activities (Klausberger & Somogyi, 2008; Amilhon *et*  
71 *al.*, 2015; Gan *et al.*, 2017) as well as the segregation of PCs into functional assemblies  
72 (Agetsuma *et al.*, 2018). However, in addition to excitatory inputs from PCs, PV INs also  
73 receive GABAergic innervation from local interneurons (Chamberland & Topolnik, 2012),  
74 including some specialized in interneuron inhibition (Gulyas *et al.*, 1996), as well as long-  
75 range projecting interneurons (Freund & Antal, 1988). Although GABAergic synapses formed  
76 onto PV INs share many properties with those impinging onto principal cells, input- and cell-  
77 specific properties were also reported (Chamberland & Topolnik, 2012). For instance,  
78 predominant expression of the  $\alpha 1$  GABAAR subunit confers PV INs with faster postsynaptic  
79 current kinetics as compared to PCs (Gao & Fritschy, 1994; Bartos *et al.*, 2002).

80

81 Since GABAARs are predominantly chloride-permeable channels (Bormann *et al.*, 1987),  
82 transmembrane chloride gradients also represent a major source of variability for GABA  
83 signaling. Cation chloride cotransporters (CCCs) play a critical role in regulating chloride

84 gradients in neurons. Thus, the  $\text{Na}^+ \text{K}^+ \text{Cl}^-$  transporter NKCC1 and the  $\text{K}^+ \text{Cl}^-$  transporter KCC2  
85 are secondary active transporters that regulate intraneuronal chloride using the  $\text{Na}^+$  and  $\text{K}^+$   
86 electrochemical gradients generated by the Na/K-ATPase (Blaesse *et al.*, 2009). Delayed,  
87 postnatal KCC2 expression has been shown to contribute to a progressive shift in  
88 intraneuronal chloride and the polarity of GABA signaling in cortical PCs *in vitro* (Rivera *et al.*,  
89 1999). *In vivo*, GABA was shown to depolarize immature PCs and yet exert a predominantly  
90 inhibitory action on their activity (Kirmse *et al.*, 2015), due to membrane resistance  
91 shunting.

92

93 However, much less is known regarding chloride handling in GABAergic interneurons. Thus,  
94 the reversal potential of GABAAR-mediated currents ( $E_{\text{GABA}}$ ) was suggested to be more  
95 depolarized in unidentified hippocampal *stratum radiatum* interneurons compared with  
96 neighboring PCs (Patenaude *et al.*, 2005). In addition, the driving force of GABAAR-mediated  
97 currents was shown to remain unchanged during postnatal maturation, in *stratum oriens*  
98 interneurons (Banke & McBain, 2006) but appear to exhibit a hyperpolarizing shift in dentate  
99 gyrus basket cells (Sauer & Bartos, 2010). Although most interneurons subtypes were shown  
100 to strongly express KCC2 in the adult rat hippocampus (Gulyas *et al.*, 2001), how CCC  
101 expression or function control the polarity and efficacy of GABA signaling in these cells  
102 remains unknown. One difficulty in addressing this question relates to the diversity and bias  
103 of experimental approaches used to evaluate the effect of GABA or chloride transport with  
104 minimal perturbation of the neuronal integrity. Here, we used a combination of both  
105 invasive and non-invasive *in vitro* electrophysiological approaches to compare GABA  
106 signaling in mouse CA1 PV INs and PCs in adult mouse hippocampus. Our results reveal that

107 GABA predominantly exerts depolarizing yet inhibitory actions over both cell types. KCC2  
108 and NKCC1 appear to be functional in both PV INs and PCs even though the two cell types  
109 exhibit different somato-dendritic chloride gradients. Finally, we demonstrate that CCCs do  
110 not contribute in activity-dependent depression of GABAAR-mediated transmission upon  
111 moderate activation frequency (10 Hz). Together our results demonstrate that, in the adult  
112 hippocampus, PV INs and PCs both rely on CCC activity to maintain inhibitory GABA signaling.

113

## 114 **Methods**

### 115 *Animals*

116 *Pvalb*<sup>tm1<sup>(cre)</sup>Arbr</sup>/J mice were crossed with *Gt(ROSA)26Sor*<sup>tm14(CAG-tdTomato)Hze</sup>/J (Ai14) reporter  
117 mice expressing the red fluorescent protein tdTomato. The genetic background of both  
118 *Pvalb*<sup>tm1<sup>(cre)</sup>Arbr</sup>/J and Ai14 mice was C57BL/6J and dual homozygous male or female mice  
119 typically aged 35-70 days were used in all experiments. Since we did not observe sex-  
120 dependent differences in the biological parameters tested in this study, data from animals of  
121 either sex were grouped. All procedures conformed to the International Guidelines on the  
122 ethical use of animals, the French Agriculture and Forestry Ministry guidelines for handling  
123 animals (decree 87849, licence A 75-05-22) and were approved by the Charles Darwin ethical  
124 committee (APAFIS#4018-2015111011588776 v7).

125

### 126 *Immunohistochemistry and imaging*

127 Mice were deeply anesthetized by intraperitoneal injection of ketamine/xylazine (100/20  
128 mg.kg<sup>-1</sup>) and perfused transcardially with oxygenated ice-cold solution containing in mM :  
129 110 choline-Cl, 2.5 KCl, 1.25 NaH<sub>2</sub>PO<sub>4</sub>, 25 NaHCO<sub>3</sub>, 25 glucose, 0.5 CaCl<sub>2</sub>, 7 MgCl<sub>2</sub>, 11.6  
130 ascorbic acid, 3.1 Na pyruvate (~300 mOsm), equilibrated with 95% O<sub>2</sub>-5% CO<sub>2</sub>. Brains were  
131 removed and fixed for 4-5 h at 4°C with 4% paraformaldehyde in 0.1M sodium phosphate  
132 buffer (pH 7.5) and cryoprotected in 30% sucrose in PBS for an additional 24h. Coronal, 40  
133 µm-thick sections were cut with a cryotome. Free-floating sections were rinsed in PBS and  
134 incubated for 4 h in PBS supplemented with 0.5% Triton X-100 and 5% normal goat serum.  
135 They were then incubated for 48 h at 4°C with rabbit polyclonal KCC2 antibody (1:400)  
136 diluted in PBS supplemented with 0.1% Triton X-100 and 5% normal goat serum before being

137 rinsed in PBS and incubated overnight at 4°C with biotinylated WFA lectin (1:500). The  
138 sections were then rinsed in PBS and then incubated for 4h with donkey anti-rabbit Cy5,  
139 rinsed in PB and incubated for 40 min with streptavidin Alexa-488. After rinsing in PB, the  
140 sections were mounted with Mowiol/Dabco (25 mg.ml<sup>-1</sup>) and stored at 4°C.

141

142 KCC2-immunolabeled sections were imaged with a Leica SP5 confocal microscope using a  
143 63x 1.40-N.A. objective with 2X electronic magnification and Ar/Kr laser set at 488, 561 and  
144 633 nm for excitation of Alexa-488, td-tomato and Cy5, respectively. Stacks of 10 optical  
145 sections were acquired at a pixel resolution of 0.12 µm and a z-step of 0.29 µm.

146

#### 147 *Electrophysiological recordings*

148 Mice were deeply anesthetized by intraperitoneal injection of ketamine/xylazine (100/20  
149 mg.kg<sup>-1</sup>, Sigma-Aldrich) and transcardially perfused with ice-cold solution containing (in  
150 mM): 110 choline-Cl, 2.5 KCl, 1.25 NaH<sub>2</sub>PO<sub>4</sub>, 25 NaHCO<sub>3</sub>, 25 glucose, 0.5 CaCl<sub>2</sub>, 7 MgCl<sub>2</sub>, 11.6  
151 ascorbic acid, 3.1 Na pyruvate (~300 mOsm), equilibrated with 95% O<sub>2</sub>-5% CO<sub>2</sub>. Mice were  
152 then decapitated and 350 µm-thick parasagittal brain slices were prepared with a vibratome  
153 (Microm, Thermo Scientific, France) in the same ice-cold solution and maintained in a  
154 humidified interface chamber saturated with 95% O<sub>2</sub>-5% CO<sub>2</sub> for 10 minutes at 34°C and  
155 then at room temperature until use. Artificial cerebrospinal fluid (ACSF) for slice  
156 maintenance and recording contained (in mM): 126 NaCl, 26 NaHCO<sub>3</sub>, 10 D-glucose, 3.5 KCl,  
157 1.6 CaCl<sub>2</sub>, 1.2 MgCl<sub>2</sub>, 1.25 NaH<sub>2</sub>PO<sub>4</sub>. For recordings, slices were transferred into a chamber



158 (BadController V; Luigs & Neumann) maintained at 32°C and mounted on an upright  
159 microscope (BX51WI; Olympus). Slices were superfused with ACSF at a rate of 2.5 ml.min<sup>-1</sup>.

160 Loose cell-attached recordings (seal resistance: 15-25 MΩ) were made using 4-6 MΩ  
161 borosilicate glass pipettes containing normal ACSF or HEPES-buffered saline containing (in  
162 mM): 150 NaCl, 3.5 KCl, 1.6 CaCl<sub>2</sub>, 1.2 MgCl<sub>2</sub>, 10 HEPES, pH 7.4 with NaOH (300 mOsm) in the  
163 presence of excitatory transmission blockers (10 μM NBQX and 50 μM D-APV) at a holding  
164 potential of 0 mV. Recordings were established by gently pushing the pipette against the  
165 membrane of the cell. Signals were filtered at 4 kHz and acquired using pClamp software  
166 (Molecular Devices) in voltage clamp mode at a sampling rate of 10-20 kHz.

167

168 Tight cell-attached recordings (Perkins, 2006) were performed in the presence of 10 μM  
169 NBQX and 50 μM D-APV under current-clamp configuration (I=0 mode) to evaluate the  
170 polarity of GABAAR-mediated potentials. Recording pipettes (4-9 MΩ) were filled with the  
171 HEPES-buffered saline. Seal resistance in the cell-attached mode was >4 GΩ. Voltage signals  
172 were filtered at 4 kHz and sampled at 10-20 kHz.

173

174 For whole-cell recordings, pipettes (3–5 MΩ resistance) were filled with a solution containing  
175 (in mM): 115 K-gluconate, 25.4 KCl, 10 HEPES, 10 EGTA, 1.8 MgCl<sub>2</sub>, 2 Mg-ATP, 0.4 Na<sub>3</sub>-GTP,  
176 pH 7.4 (290 mOsm) supplemented with Alexa 594 (20 μM) to check cell morphology. Images  
177 of the soma and dendrites were acquired at least 15 min after break in, using 535 nm  
178 excitation light (CoolLED) to prevent RuBi-GABA uncaging. Cells were voltage-clamped at -60  
179 or -70 mV. Voltage was corrected *post hoc* for liquid junction potential (-11 mV) and voltage

180 drop across the series resistance ( $<25 \text{ M}\Omega$ ) of the pipette. Currents were filtered at 4 kHz  
181 and sampled at 10 kHz.

182 For gramicidin-perforated patch recordings, the tip of the recording pipette was filled with  
183 gramicidin-free solution containing (in mM): 120 KCl, 10 HEPES, 11 EGTA, 1  $\text{CaCl}_2$ , 2  $\text{MgCl}_2$ ,  
184 35 KOH, 30 glucose adjusted to pH 7.3 with KOH (300 mOsm). The pipette was then  
185 backfilled with the same solution containing 100  $\mu\text{g/ml}$  gramicidin and 20  $\mu\text{M}$  Alexa 488 to  
186 verify membrane integrity during the recording. Gramicidin was prepared as a stock solution  
187 at 50 mg/ml in DMSO. Pipette resistance was 4-5  $\text{M}\Omega$ . Cells were voltage-clamped at -70 mV.  
188 Recordings were started once series resistance was less than 100  $\text{M}\Omega$  ( $52.5 \pm 7.6 \text{ M}\Omega$  for PV  
189 INs ( $n=10$ ) and  $69.1 \pm 5.8 \text{ M}\Omega$  for PCs ( $n=16$ )). The Donnan potential between the pipette  
190 solution and cell cytoplasm was measured (Kim & Trussell, 2007) after spontaneous  
191 membrane rupture ( $11.7 \pm 1.1 \text{ mV}$ ;  $n = 4$ ). The Donnan potential was partly offset by a liquid  
192 junction potential of -4 mV. Therefore, the holding potential in gramicidin-perforated  
193 recordings reads 7.7 mV more hyperpolarized than the actual membrane potential.  
194 Potentials were corrected for this residual potential and voltage drop across the series  
195 resistance of the pipette. Spontaneous action potentials (APs) and resting membrane  
196 potential ( $V_m$ ) were monitored under current clamp configuration ( $I=0$  mode) while  $E_{\text{GABA}}$   
197 was measured by RuBi-GABA photolysis under voltage clamp.  $V_m$  was estimated by  
198 averaging membrane potential every 500 ms for 30-60 sec in normal ACSF. Membrane  
199 potential in the presence of drugs for photolysis were similarly computed over 30-60 sec  
200 (Fig. 6A). The threshold for action potential initiation was determined from the first peak in  
201 the third derivative of action potential waveforms averaged from  $> 4$  APs (Henze & Buzsaki,  
202 2001). Currents were filtered at 10 kHz and sampled at 10-20 kHz.

203

204 *Photolysis*

205 Photolysis of RuBi-GABA (15  $\mu$ M) onto parvalbumin positive interneurons (PV INs) or  
206 pyramidal cells (PCs) was performed in the presence of 10  $\mu$ M NBQX, 50  $\mu$ M D-APV, 2  $\mu$ M  
207 CGP55845 and 1  $\mu$ M tetrodotoxin (TTX). A 405 nm laser diode beam (Deepstar, Omicron,  
208 Photon Lines, France) conducted through a multimode optic fibre and alignment device  
209 (Prairie Technologies, Middleton, WI, USA) was set to generate a 3-5  $\mu$ m spot in the  
210 objective focus and directed to the soma or distal dendrites of the recorded neurons. The  
211 power of the laser head output was controlled using Omicron Laser Controller v2.97, while  
212 trigger and pulse duration were set using pClamp software and a Digidata controller.  
213 Photolysis was induced by a 0.5-1 msec pulse at 10 mW on the soma or 3-5 msec at 10 mW  
214 on distal dendrites. Series of 15 s voltage steps with a 5 mV increment were applied to the  
215 pipette with an inter-episode interval of 40 sec. Laser pulses were delivered at 12 sec after  
216 the onset of the voltage step to allow for stabilization of the holding current. The amplitude  
217 of GABA-evoked currents was computed as the difference between the current measured  
218 over a 4 ms window centered on the peak and the baseline current averaged over 3 ms prior  
219 to the laser flash. The distance from soma for dendritic uncaging was measured offline with  
220 NeuronJ (Meijering *et al.*, 2004), based on Alexa 594 fluorescence imaging of the recorded  
221 neuron.

222

223 *Drug application*

224 Isoguvacine (100  $\mu$ M; Tocris Bioscience) was dissolved in normal ACSF supplemented with 2  
225  $\mu$ M Alexa 488 to detect regions puffed through a patch pipette using a Picosplitzer III (5 sec

226 at 10 psi). All other drugs were bath applied: NBQX, D-AP5, were from Hello Bio (Bristol, UK).  
227 Isoguvacine, RuBi-GABA trimethylphosphine, CGP55845, VU0463271 were from Tocris  
228 Bioscience (Bristol, UK). TTX was from Latoxan. All other drugs were from Sigma-Aldrich  
229 France. CGP55845, VU0463271 and bumetanide were dissolved in DMSO for stock solutions.

230

### 231 *Data analysis*

232 Electrophysiological data analysis was performed offline using Clampfit 10 (Molecular  
233 Devices, USA) and custom routines written in Igor Pro 6 (WaveMetrics, USA).

234

### 235 **Statistical analysis**

236 The results are presented as mean  $\pm$  SEM throughout the manuscript and in all figures. For  
237 statistical analyses, non-parametric Mann-Whitney or Wilcoxon signed-rank tests were used  
238 unless Shapiro-Wilk normality test was passed and Student's t-test could be used. Multiple  
239 linear regression analysis was performed using SigmaPlot 12,5 (SPSS). Statistical significance  
240 was set at  $p < 0.05$ .

241

242

243

244

245

246

247 **Results**

248 **KCC2 expression in hippocampal parvalbumin interneurons**

249 Although the expression and function of CCCs are well characterized in hippocampal  
250 principal neurons, whether they are expressed and functional in GABAergic interneurons  
251 remains largely unexplored. We used immunohistochemistry in *Pvalb*<sup>tm1<sup>(cre)</sup>Arbr/</sup>::*Ai14* mice to  
252 investigate KCC2 expression in mouse hippocampal parvalbumin interneurons (PV INs) (Le  
253 Roux *et al.*, 2013).

254

255 In all hippocampal subfields, KCC2 expression was observed in td-tomato-positive  
256 interneurons (Figure 1A). As in PCs, KCC2 immunostaining in PV INs was mostly pericellular,  
257 likely reflecting predominant membrane expression (Figure 1B). However, KCC2 expression  
258 in PV INs was sometimes difficult to distinguish from that in neighboring PCs. To circumvent  
259 this problem, we used extracellular matrix staining to precisely visualize PV IN contours.  
260 Hippocampal PV INs somata and proximal dendrites are wrapped by a chondroitin sulfate  
261 proteoglycan-rich extracellular matrix, called perineuronal net (PNN) (Hartig *et al.*, 1992).  
262 Thus using specific staining of PNNs with Wisteria Floribunda Agglutinin (WFA), KCC2  
263 immunostaining in PV INs could be distinguished from that in adjacent principal neurons as it  
264 was surrounded by WFA staining, further confirming KCC2 expression in PV INs (Figure 1B).

265 These results support the conclusion that KCC2 protein is expressed at the membrane of PV  
266 INs in the adult mouse hippocampus.

267 (Figure 1 near here)

268 **Net effect of GABAAR activation on CA1 pyramidal neurons and parvalbumin interneurons.**

269 We next asked whether cation-chloride cotransporters are functional in CA1 PV INs and how  
270 they influence GABAAR-mediated signaling in these cells. Loose cell-attached recordings  
271 allow detection of action potentials from identified neurons with minimal perturbation of  
272 their physiology (Llano & Marty, 1995). We first used this approach to evaluate the  
273 excitatory vs. inhibitory nature of GABA transmission in CA1 PV INs and neighboring  
274 pyramidal neurons (PCs). The effect of GABAAR activation was tested by locally puffing the  
275 GABAAR agonist isoguvacin (100  $\mu$ M, 5 s) onto the soma of the recorded cell. In order to  
276 prevent the influence of polysynaptic EPSPs, recordings were performed in the presence of  
277 AMPA and NMDA receptor antagonists. Under these conditions however only a few (5 of 27)  
278 PV INs exhibited spontaneous firing (Figure 2A). Out of 27 recorded PV INs, isoguvacine  
279 induced firing in 1, blocked firing in 5 and had no detectable effect in 21 interneurons. In the  
280 presence of the NKCC1 antagonist bumetanide (10  $\mu$ M), however, isoguvacine suppressed  
281 firing in 7 of 14 PV INs, suggesting bumetanide hyperpolarizes  $E_{GABA}$  in PV INs. The KCC2  
282 specific antagonist VU0463271 (10  $\mu$ M), on the other hand, increased the proportion of PV  
283 INs that were excited by isoguvacine (3 of 13 cells) while the proportion of cells that were  
284 inhibited was similar to that observed in the presence of bumetanide (6 of 13 cells; Figure  
285 2C). These results suggest the effect of GABAA receptor activation is predominantly  
286 inhibitory in PV INs and is influenced by the function of both KCC2 and NKCC1.

287 (figure 2 near here)

288 In neighboring PCs, isoguvacine had little effect on firing (5 of 23 cells), mostly owing to the  
289 fact that most of them were silent (18 of 23 cells) prior to isoguvacine application, making it  
290 difficult to assess the inhibitory or excitatory nature of GABA signaling. Bumetanide had only  
291 very little effect on the proportion of pyramidal cells excited (1 of 10 cells) or inhibited (1 of

292 10 cells) by isoguvacine, whereas VU0463271 induced a large increase in the proportion of  
293 excited neurons (7 of 11 cells) (Figure 2D). This excitatory effect was still observed in the  
294 presence of both bumetanide and VU0463271 (3 of 11 cells), as with PV INs. In slices from  
295 younger (3-7 days old) animals, however, isoguvacine application was sufficient to trigger  
296 firing in 26 out of 66 neurons under control conditions, suggesting GABA signaling in PCs was  
297 clearly excitatory at this age.

298

299 Altogether, these results suggest KCC2 and NKCC1 are functional in both CA1 pyramidal cells  
300 and PV INs and influence the efficacy of GABA signaling. However, the high proportion of  
301 silent neurons under our recording conditions makes it difficult to draw firm conclusions  
302 regarding the polarity of GABA transmission in these cells under physiological conditions.

303

304 Tight-seal, cell-attached recordings provide another, minimally invasive approach to detect  
305 the polarity of synaptic potentials without rupturing the cell membrane and perturbing  
306 transmembrane ionic gradients (Perkins, 2006). In particular, gigaseal recordings allow a  
307 fairly reliable measurement of both neuronal resting membrane potential and the polarity  
308 (but not the actual amplitude) of synaptic potentials (Mason *et al.*, 2005; Perkins, 2006). We  
309 recorded currents evoked by GABAAR activation with isoguvacine in gigaseal mode from  
310 both CA1 PV INs and PCs (Figure 3A). In both cell types, isoguvacine-induced potentials were  
311 predominantly depolarizing (5 of 7 and 5 of 6 cells, respectively). This proportion was similar  
312 to recordings from immature (P3-P7) CA1 pyramidal neurons (6 of 9 cells, Figure 3B).  
313 Together, these results suggest that, at least in the absence of glutamatergic drive, both CA1  
314 PCs and PV INs are predominantly depolarized upon GABAAR activation, even though a

315 significant fraction are functionally inhibited, likely due to shunting of their membrane  
316 resistance (Staley & Mody, 1992).

317 (Figure 3 near here)

### 318 **KCC2-mediated chloride extrusion in CA1 parvalbumin interneurons**

319 Transmembrane chloride transport can be directly estimated from whole-cell recordings of  
320 GABA-evoked currents while clamping somatic chloride concentration (Khirug *et al.*, 2008;  
321 Gauvain *et al.*, 2011). The gradient of the reversal potential of GABAAR-mediated currents  
322 ( $E_{\text{GABA}}$ ) along the somato-dendritic membrane then reflects actual transmembrane chloride  
323 extrusion. We compared  $E_{\text{GABA}}$  gradients in CA1 PV INs and PCs using local photolysis of  
324 RubiGABA (15  $\mu\text{M}$ , 0.5-5 ms laser pulse, see Methods). As in other cortical neurons (Khirug *et al.*,  
325 *et al.*, 2008; Gauvain *et al.*, 2011),  $E_{\text{GABA}}$  in PV INs, was always more depolarized for somatically-  
326 evoked currents, as compared to currents evoked onto dendrites 50-250  $\mu\text{m}$  away from the  
327 soma (Figure 4). This somato -dendritic gradient ( $\Delta E_{\text{GABA}}$ ) however was significantly steeper  
328 in neighboring PCs as compared with PV INs ( $-21.1 \pm 1.7$  vs  $-12.6 \pm 0.7$  mV/100  $\mu\text{m}$ ; 11  
329 dendritic sites in 8 cells and 17 dendritic sites in 9 cells, respectively,  $p < 0.001$ ; Figure 5A-B),  
330 suggesting chloride extrusion along dendrites may be less effective in PV INs. However, the  
331 effect of KCC2 and NKCC1 blockers on  $\Delta E_{\text{GABA}}$  was not significantly different between the two  
332 cell types. Thus, the KCC2 specific antagonist VU046321 produced similar reduction in the  
333 somato-dendritic gradient of  $E_{\text{GABA}}$  in PV INs ( $-58.5 \pm 3.0$  %, 15 dendritic sites in 9 cells) and  
334 PCs ( $-57.1 \pm 2.7$  %, 9 dendritic sites in 7 cells,  $p = 0.770$ ; Figure 4B and 5C). Further application  
335 of the NKCC1 antagonist bumetanide also produced similar increase in  $\Delta E_{\text{GABA}}$  in PV INs and  
336 PCs ( $+41.5 \pm 7.2$  % and  $+45.7 \pm 8.5$ , respectively, as compared to VU046321 only;  $p = 0.67$ , Figure  
337 5C). This suggests NKCC1 activity may significantly contribute to transmembrane chloride



338 gradients in both cell types, at least upon KCC2 blockade. Altogether, these observations  
339 demonstrate chloride extrusion is more efficient along the dendrites of PCs as compared  
340 with PV INs and suggest mechanisms other than CCC function may contribute to this  
341 difference.

342 (Figure 4 near here)

343 Remarkably, although somatic chloride concentration was expected to be clamped by the  
344 internal solution of the pipette, somatic  $E_{GABA}$  was more hyperpolarized than that estimated  
345 by the Nernst equation (-41.3 mV, dashed line in Figure 5D) and more so in PV INs than PCs  
346 ( $53.1 \pm 1.1$  vs  $46.5 \pm 0.9$  mV,  $n=10$  and 8 cells, respectively,  $p=0.003$ ; Figure 5D). This suggests  
347 that active chloride transport i) may generate transmembrane chloride gradients that do not  
348 directly reflect the mean intracellular and extracellular concentrations and ii) is more  
349 efficient in the soma of PV INs than in PCs. Consistent with this hypothesis, somatic  $E_{GABA}$   
350 was more depolarized upon application of VU0463271 in PV INs than in PCs ( $+4.9 \pm 0.6$  vs  
351  $+2.8 \pm 0.6$  mV,  $n=9$  and 7 cells, respectively,  $p=0.039$ ; Figure 5E). Further application of  
352 bumetanide however had no significant effect on  $E_{GABA}$  in either cell type, suggesting NKCC1  
353 does not contribute significantly to somatic transmembrane chloride gradients when  
354 intracellular chloride concentration is high ( $-0.43 \pm 0.4$  vs  $-0.71 \pm 0.7$  mV,  $n=8$  and 7 cells,  
355 respectively,  $p=0.95$ ; Figure 5E). Altogether, our results demonstrate that KCC2 and NKCC1  
356 are functional in PC INs and contribute to establish steady-state transmembrane chloride  
357 gradients. The relative contribution of each transporter to somatic gradients however differ  
358 between PV INs and PCs.

359 (Figure 5 near here)

360 In order to assess both  $E_{GABA}$  and  $V_m$  while preventing perturbation of intracellular anion  
361 homeostasis, we next used gramicidin-perforated patch recordings. First, we measured  $V_m$   
362 and tested the effect of pharmacologically blocking the excitatory drive onto CA1 PV INs and  
363 PCs, as in experiments shown in Figure 2 and 3. Whereas all PV INs were spontaneously  
364 firing at rest (frequency:  $4.0 \pm 1.4$  Hz,  $n=14$  cells), application of AMPA and NMDAR blockers  
365 hyperpolarized their membrane potential by  $3.5 \pm 0.6$  mV (Figure 6A and 6Bb). Most PCs (12  
366 out of 15) were also spontaneously firing but had lower firing frequency ( $0.23 \pm 0.1$  Hz,  
367  $p < 0.001$ ) and threshold ( $p = 0.006$ ) (Figure 6A and 6Bc). Glutamate receptor antagonists also  
368 hyperpolarized CA1 pyramidal cells, yet to a lesser extent than PV INs ( $0.96 \pm 0.3$  mV,  
369  $p = 0.001$ ,  $n = 13$  cells of each type, Figure 6Bb), consistent with the latter receiving massive  
370 excitatory drive as compared with neighboring pyramidal cells (Gulyas *et al.*, 1999; Takacs *et*  
371 *al.*, 2012). Remarkably, these values of  $V_m$  measured in the presence of glutamate receptor  
372 antagonists were very similar to those derived from gigaseal recordings ( $71.6 \pm 0.6$  vs  $-74.9 \pm$   
373  $2.0$  mV ( $n=7$ ) for PV INs and  $-74.9 \pm 1.8$  vs  $-74.2 \pm 0.7$  mV ( $n=8$ ) for PCs; Figure 3). GABAAR -  
374 mediated currents were then evoked using focal uncaging of RubiGABA, as above, and  $E_{GABA}$   
375 was derived from current-voltage relations of somatically evoked currents (Figure 6C-D).  
376  $E_{GABA}$  was significantly more depolarized in PV INs as compared with PCs ( $-64.1 \pm 2.3$  vs -  
377  $71.7 \pm 0.7$  mV,  $p = 0.003$ ,  $n = 10$  and 16 cells, respectively; Figure 6E). However, due to more  
378 depolarized  $V_m$  in PV INs (Figure 6Ba), the driving force of GABAAR-mediated currents at rest  
379 was similar in the two cell types ( $3.8 \pm 2.2$  vs  $1.7 \pm 1.0$  mV,  $n=10$  and 13 cells, respectively;  
380  $p = 0.34$ ; Figure 6F). Also consistent with gigaseal recordings,  $E_{GABA}$  was slightly more  
381 depolarized than  $V_m$  both in PV INs and PCs. Application of VU0463271 depolarized somatic  
382  $E_{GABA}$  in both cell types (by  $12.5 \pm 1.6$  and  $16.1 \pm 1.5$  mV, in PV INs ( $n=3$ ) and PCs ( $n=8$ ),  
383 respectively; Figure 6G) whereas further application of bumetanide only slightly

384 hyperpolarized  $E_{\text{GABA}}$ . This suggests that, under steady-state conditions,  $E_{\text{GABA}}$  in both PV INs  
385 and PCs is moderately depolarized as compared with  $V_m$  and predominantly influenced by  
386 the activity of KCC2, whereas NKCC1 contribution is minor. Importantly, however, although  
387 GABA may have depolarizing actions in both cells types, its effect is mostly shunting as  $E_{\text{GABA}}$   
388 is more hyperpolarized than the action potential threshold (Figure 6H). Suppressing KCC2  
389 activity may however be sufficient to depolarize  $E_{\text{GABA}}$  beyond this threshold, thereby  
390 promoting firing, as observed in Figure 2.

391 (Figure 6 near here)

### 392 **Dynamic regulation of GABA signaling in CA1 parvalbumin interneurons and pyramidal** 393 **cells**

394 Repetitive activation of GABAARs has been shown in a variety of neurons to result in activity-  
395 dependent depression. This depression was attributed to intracellular chloride buildup  
396 (Thompson & Gahwiler, 1989a; Staley & Proctor, 1999; Jedlicka *et al.*, 2011) or to receptor  
397 desensitization (Thompson & Gahwiler, 1989c; Jones & Westbrook, 1995) or a combination  
398 of both. We compared the contribution of these mechanisms upon repetitive activation of  
399 GABAARs in CA1 PV INs and neighboring PCs. In order to exclude presynaptic mechanisms  
400 that may contribute to short-term, activity-dependent changes in GABA release (Thompson  
401 & Gahwiler, 1989c; Zucker & Regehr, 2002), GABAAR activation was achieved by repetitive  
402 (10 Hz), focal uncaging of RubiGABA onto the soma or dendrites of neurons recorded in  
403 gramicidin-perforated patch mode (Figure 7A). We then compared the dynamics of GABAAR-  
404 mediated currents evoked while holding cells below (-85 to -60 mV) or above (-70 to -50 mV)  
405 their reversal potential. Both in PV INs and PCs, the peak amplitude of GABAAR-mediated  
406 currents decayed with very similar kinetics during the train, independent of their polarity

407 (soma:  $\tau_{\text{inward}}=0.11\pm 0.01$  vs  $0.17\pm 0.04$  s<sup>-1</sup>, Mann-Whitney test p=0.291;  $\tau_{\text{outward}}=0.10\pm 0.02$  vs  
408  $0.13\pm 0.01$  s<sup>-1</sup>, Mann-Whitney test p=0.232; n=6 and 11 cells, respectively) and their site of  
409 initiation (soma vs dendrite;  $0.242 < p < 0.695$  ; Figure 7B). This observation suggests the  
410 mechanisms involved in the activity-dependent depression of GABAAR-mediated currents  
411 during a train of 10 Hz stimulation is unlikely to primarily involve changes in transmembrane  
412 ionic gradients. Consistent with this conclusion, application of the KCC2 antagonist  
413 VU0463271 had no detectable effect on the decay of outward GABAAR-mediated currents,  
414 either in PV INs ( $\tau_{\text{outward}}=0.13\pm 0.03$  vs  $0.11\pm 0.04$  s<sup>-1</sup>, paired t-test p=0.363; n=2 cells) or in PCs  
415 ( $\tau_{\text{outward}}=0.11\pm 0.00$  vs  $0.11\pm 0.01$  s<sup>-1</sup>, paired t-test p=0.848; n=4 cells ; Figure 7C). We conclude  
416 that, at least in our range of current amplitude and stimulation frequency, activity-  
417 dependent depression of GABAAR-mediated currents is largely independent of CCC function  
418 and does not reflect changes in transmembrane chloride gradients.

419

(Figure 7 near here)

## 420 Discussion

421 We have used a combination of approaches to assess and compare the polarity of GABA  
422 signaling in adult mouse CA1 hippocampal PCs and PV INs. Our results reveal that the basic  
423 mechanisms of steady-state chloride handling controlling GABA transmission are similar in  
424 both neuronal types, with a predominantly depolarizing yet inhibitory effect under resting *in*  
425 *vitro* conditions. PV INs and PCs, however, show different behaviors upon intracellular  
426 chloride loading, that may reflect differential distribution, regulation or efficacy of cation  
427 chloride cotransport along their somato-dendritic axis as well as electrotonic properties.  
428 Finally, we have shown that activity-dependent depression of GABAR-mediated transmission  
429 is largely independent of the polarity of the evoked currents and the activity of the  
430 transporters. This suggests this form of plasticity may not predominantly involve  
431 postsynaptic chloride loading, at least under moderate regimes of synaptic activation.

432

433 Evaluating the net effect of GABAAR activation in neurons is technically challenging as all  
434 experimental approaches may introduce some bias. Classical electrophysiological techniques  
435 may induce cell dialysis, compromise membrane integrity or underestimate Donnan  
436 potentials between pipette solution and the neuronal cytoplasm (Marty & Neher, 1995).  
437 Non-invasive approaches, such as loose-patch recordings, are then often used to assess the  
438 polarity and/or the net effect of GABAAR activation on neuronal activity (Deidda *et al.*, 2015;  
439 Lozovaya *et al.*, 2019). This approach, however, is only valid when recorded cells display  
440 spontaneous firing. As focal application of GABAAR agonists may affect the activity of  
441 neighboring neurons and subsequently modify that of the recorded neuron, we performed  
442 these recordings in the presence of glutamate receptor antagonists (Fig. 1). In the absence of

443 excitatory drive, however, most recorded neurons (either PV INs or PCs) did not exhibit  
444 spontaneous firing and the effect of GABAAR activation could not be tested. These  
445 experiments nevertheless showed that GABA agonists mostly inhibit spontaneously firing PV  
446 INs. Cell-attached current clamp recordings provide another, minimally invasive approach to  
447 evaluate the polarity of synaptic potentials as well as resting membrane potential (Perkins,  
448 2006; Kirmse *et al.*, 2015). Such recordings showed that GABAAR activation mostly induces  
449 membrane depolarization in both PV INs and PCs in adult mouse hippocampus, as well as in  
450 PCs from immature (P3-7) hippocampus. This observation is supported by gramicidin-  
451 perforated patch recordings, which revealed a depolarizing driving force for GABAAR-  
452 mediated currents (Fig. 6). Although  $E_{\text{GABA}}$  was more depolarized in CA1 PV INs than in  
453 neighboring PCs, the driving force of GABAAR-mediated currents was remarkably similar,  
454 due to a more depolarized resting membrane potential in PV INs. Importantly, under control  
455 conditions, such depolarization was not sufficient to reach action potential threshold (Fig.  
456 6H), consistent with a predominantly shunting and inhibitory effect. This observation is in  
457 line with earlier studies on cerebellar interneurons (Chavas & Marty, 2003), unidentified  
458 hippocampal interneurons (Verheugen *et al.*, 1999; Banke & McBain, 2006) as well as  
459 presumptive dentate gyrus PV INs (Sauer & Bartos, 2010).

460

461 Very few studies have explored CCC expression in cortical interneurons and data are  
462 somewhat controversial, possibly due to the differential expression of distinct isoforms  
463 (Uvarov *et al.*, 2007; Markkanen *et al.*, 2014). Thus, KCC2 was shown to be expressed in  
464 MGE-derived interneurons earlier than in neighboring pyramidal cells during embryogenesis  
465 and to control the termination of their migration (Bortone & Polleux, 2009). However, KCC2

466 expression and function in specific MGE-derived subtypes in postnatal cortex have not been  
467 further explored. In the cerebellum on the contrary, KCC2 expression is very weak in early  
468 postnatal presumptive baskets cells and increases postnatally (Simat *et al.*, 2007). In the  
469 adult rat hippocampus, KCC2 was shown to be strongly expressed in PV-immunopositive  
470 interneurons (Gulyas *et al.*, 2001), consistent with our immunohistochemical data (Fig. 1).  
471 Due to the delayed expression of parvalbumin in PV INs (Solbach & Celio, 1991), we could  
472 not, however, visualize CA1 PV INs in PVCre::Ai14 mice in early postnatal mice and therefore  
473 could not evaluate the temporal profile of KCC2 expression and function in these cells at  
474 earlier stages. In addition, the lack of a specific NKCC1 antibody for immunohistochemistry  
475 precluded examination of NKCC1 expression in PV INs and PCs. Our pharmacological data,  
476 however, support that both transporters are expressed and functional in both cell types in  
477 PV INs and PCs in the adult mouse hippocampus. Thus, the KCC2 antagonist VU0463271 and  
478 the NKCC1 antagonist bumetanide had opposing actions on i) the net effect of GABAAR  
479 activation on firing (Fig 2), the efficacy of transmembrane chloride export (Fig. 5) and  $E_{GABA}$   
480 (Fig. 6) in both PV INs and PCs. Interestingly, however, although KCC2 and NKCC1 blockade  
481 had similar effects on somatic  $E_{GABA}$  in PV INs and PCs in perforated-patch recordings (Fig.  
482 6G), we observed significant differences when cells were loaded with high intracellular  
483 chloride in whole-cell mode. Thus, the somato-dendritic gradient of  $E_{GABA}$  was more  
484 pronounced in PCs than in PV INs (Fig. 5A-B) and somatic chloride extrusion was more  
485 efficient in PV INs than in PCs. These differences are consistent with a differential expression  
486 and/or function of KCC2 and NKCC1 along the somato-dendritic axis of the two cell types,  
487 with a higher KCC2/NKCC1 function ratio in the soma of PV INs. In addition, differences in  
488 the cable properties of PV IN and PC dendrites may also contribute to this difference. Thus,  
489 lower membrane resistance of PV IN as compared to PC dendrites (Norenberg *et al.*, 2010)

490 may induce poorer space clamp of GABAAR-mediated currents evoked onto their distal  
491 dendrites. It should also be noted that, whereas the whole-cell evaluation of  $E_{\text{GABA}}$  gradients  
492 is an effective method to assess the efficacy of transmembrane chloride transport (Khirug *et*  
493 *al.*, 2008; Gauvain *et al.*, 2011), it may tend to overestimate steady-state KCC2/NKCC1  
494 function ratio, as it uses high intracellular chloride concentration. This in turn is expected to  
495 inhibit the chloride-sensitive with-no-lysine (WNK) STE20 (sterile 20)-like kinases (SPAK)  
496 kinases, resulting in reduced NKCC1 and increased KCC2 function (de Los Heros *et al.*, 2014;  
497 Friedel *et al.*, 2015; Heubl *et al.*, 2017).

498

499 Activity-dependent depression of GABAAR-mediated transmission is well-documented and  
500 likely results from a combination of factors involving both pre- and postsynaptic elements  
501 (Thompson & Gahwiler, 1989a, b, c). In particular, several studies suggested repetitive  
502 activation of GABAARs may lead to postsynaptic chloride loading and a subsequent  
503 depolarization of  $E_{\text{GABA}}$  (Thompson & Gahwiler, 1989a; Kaila *et al.*, 1997; Staley & Proctor,  
504 1999; Magloire *et al.*, 2019). However, these studies used massive chloride loading induced  
505 either by multi-quantal IPSCs or prolonged, high-frequency stimulation. Although such  
506 intense receptor activation may be relevant to specific, mostly pathological conditions  
507 (Magloire *et al.*, 2019), it may not represent the receptor activation at individual, somatic or  
508 dendritic sites. Our results from gramicidin-perforated patch recordings instead show that,  
509 upon 10 Hz focal Rubi-GABA uncaging for up to 1s, GABAAR-mediated currents decay in  
510 amplitude in both PV INs and PCs largely independent of both the direction of the ion flux  
511 and KCC2 function (Fig. 7). These results suggest that chloride accumulation during repetitive  
512 (10 Hz) activation at single somatic or dendritic sites is not sufficient to significantly affect



513 the driving force of GABAAR-mediated currents, likely owing to the rapid diffusion of  
514 chloride ions inside the postsynaptic cytoplasm (Doyon *et al.*, 2011). Instead, since these  
515 experiments were performed independent of synaptic stimulation, activity-dependent  
516 depression of GABAAR-mediated currents likely reflected receptor desensitization (Jones &  
517 Westbrook, 1996; Papke *et al.*, 2011; Gielen *et al.*, 2015). Our results demonstrate this  
518 process occurs with a time constant of about 100-130 ms, consistent with the intermediate  
519 component of the desensitization kinetics of recombinant  $\alpha_1\beta_{1/2}\gamma_2$ L receptors (Papke *et al.*,  
520 2011; Brodzki *et al.*, 2016). Therefore, under physiological regimes of synaptic activity,  
521 GABAAR desensitization appears as a major postsynaptic factor acting as a low-pass filter  
522 with respect to GABA signaling (Jones & Westbrook, 1996).

523

524 CCC expression is altered in a variety of neurological and psychiatric conditions including  
525 epilepsy (Palma *et al.*, 2006; Huberfeld *et al.*, 2007; Karlocai *et al.*, 2016; Kourdougli *et al.*,  
526 2017), chronic stress (MacKenzie & Maguire, 2015), Rett syndrome (Duarte *et al.*, 2013;  
527 Banerjee *et al.*, 2016; Tang *et al.*, 2016) and autism spectrum disorders (Tyzio *et al.*, 2014).  
528 Impaired chloride homeostasis has been suggested to induce paradoxical excitatory GABA  
529 signaling and thereby promote anomalous ensemble activities that underlie the pathology.  
530 Our data also suggest that KCC2 downregulation may be sufficient to depolarize EGABA  
531 above action potential threshold in PV INs (Fig. 6H). In addition, since KCC2 is involved in a  
532 variety of molecular interactions with synaptic proteins (Ivakine *et al.*, 2013; Mahadevan *et al.*,  
533 2014), ion channels (Goutierre *et al.*, 2019) and cytoskeleton-related proteins (Li *et al.*,  
534 2007; Gauvain *et al.*, 2011; Chevy *et al.*, 2015; Llano *et al.*, 2015), the loss of its expression  
535 also affects several physiological properties beyond the mere control of chloride transport

536 and GABA signaling (Chamma *et al.*, 2012). Thus, KCC2 knockdown in cortical PCs was shown  
537 to also profoundly perturb neuronal excitability as well as network activity (Kelley *et al.*,  
538 2018; Goutierre *et al.*, 2019). Since PV INs exert a critical control over the activity of cortical  
539 PCs (Pouille & Scanziani, 2001) and shape their rhythmic activities (Klausberger & Somogyi,  
540 2008; Amilhon *et al.*, 2015; Gan *et al.*, 2017), altered CCC expression in these cells would be  
541 expected to profoundly perturb cortical rhythmogenesis. As most studies on CCC expression  
542 in the pathology lacked cell-subtype resolution, whether and how it is affected in PV INs  
543 remains to be fully explored and the consequences on cortical activity should then be further  
544 investigated.

545

## 546 **References**

- 547 Agetsuma M, Hamm JP, Tao K, Fujisawa S & Yuste R. (2018). Parvalbumin-Positive  
548 Interneurons Regulate Neuronal Ensembles in Visual Cortex. *Cereb Cortex* **28**, 1831-  
549 1845.
- 550 Amilhon B, Huh CY, Manseau F, Ducharme G, Nichol H, Adamantidis A & Williams S. (2015).  
551 Parvalbumin Interneurons of Hippocampus Tune Population Activity at Theta  
552 Frequency. *Neuron* **86**, 1277-1289.
- 553 Banerjee A, Rikhye RV, Breton-Provencher V, Tang X, Li C, Li K, Runyan CA, Fu Z, Jaenisch R &  
554 Sur M. (2016). Jointly reduced inhibition and excitation underlies circuit-wide  
555 changes in cortical processing in Rett syndrome. *Proceedings of the National*  
556 *Academy of Sciences of the United States of America*.
- 557 Banke TG & McBain CJ. (2006). GABAergic input onto CA3 hippocampal interneurons  
558 remains shunting throughout development. *The Journal of neuroscience : the official*  
559 *journal of the Society for Neuroscience* **26**, 11720-11725.
- 560 Bartos M, Vida I, Frotscher M, Meyer A, Monyer H, Geiger JR & Jonas P. (2002). Fast synaptic  
561 inhibition promotes synchronized gamma oscillations in hippocampal interneuron  
562 networks. *Proceedings of the National Academy of Sciences of the United States of*  
563 *America* **99**, 13222-13227.
- 564 Blaesse P, Airaksinen MS, Rivera C & Kaila K. (2009). Cation-chloride cotransporters and  
565 neuronal function. *Neuron* **61**, 820-838.
- 566 Bormann J, Hamill OP & Sakmann B. (1987). Mechanism of anion permeation through  
567 channels gated by glycine and gamma-aminobutyric acid in mouse cultured spinal  
568 neurones. *The Journal of physiology* **385**, 243-286.
- 569 Bortone D & Polleux F. (2009). KCC2 expression promotes the termination of cortical  
570 interneuron migration in a voltage-sensitive calcium-dependent manner. *Neuron* **62**,  
571 53-71.
- 572 Brodzki M, Rutkowski R, Jatczak M, Kisiel M, Czyzewska MM & Mozrzymas JW. (2016).  
573 Comparison of kinetic and pharmacological profiles of recombinant alpha1gamma2L

- 574 and alpha1beta2gamma2L GABAA receptors - A clue to the role of intersubunit  
575 interactions. *European journal of pharmacology* **784**, 81-89.
- 576 Buzsaki G. (2010). Neural syntax: cell assemblies, synapse ensembles, and readers. *Neuron* **68**,  
577 362-385.
- 578 Chamberland S & Topolnik L. (2012). Inhibitory control of hippocampal inhibitory neurons.  
579 *Frontiers in neuroscience* **6**, 165.
- 580 Chamma I, Chevy Q, Poncer JC & Levi S. (2012). Role of the neuronal K-Cl co-transporter  
581 KCC2 in inhibitory and excitatory neurotransmission. *Frontiers in cellular*  
582 *neuroscience* **6**, 5.
- 583 Chavas J & Marty A. (2003). Coexistence of excitatory and inhibitory GABA synapses in the  
584 cerebellar interneuron network. *The Journal of neuroscience : the official journal of*  
585 *the Society for Neuroscience* **23**, 2019-2031.
- 586 Chevy Q, Heubl M, Goutierre M, Backer S, Moutkine I, Eugene E, Bloch-Gallego E, Levi S &  
587 Poncer JC. (2015). KCC2 Gates Activity-Driven AMPA Receptor Traffic through Cofilin  
588 Phosphorylation. *The Journal of neuroscience : the official journal of the Society for*  
589 *Neuroscience* **35**, 15772-15786.
- 590 de Los Heros P, Alessi DR, Gourlay R, Campbell DG, Deak M, Macartney TJ, Kahle KT & Zhang  
591 J. (2014). The WNK-regulated SPAK/OSR1 kinases directly phosphorylate and inhibit  
592 the K<sup>+</sup>-Cl<sup>-</sup> co-transporters. *The Biochemical journal* **458**, 559-573.
- 593 Deidda G, Parrini M, Naskar S, Bozarth IF, Contestabile A & Cancedda L. (2015). Reversing  
594 excitatory GABAAR signaling restores synaptic plasticity and memory in a mouse  
595 model of Down syndrome. *Nature medicine* **21**, 318-326.
- 596 Doyon N, Prescott SA, Castonguay A, Godin AG, Kroger H & De Koninck Y. (2011). Efficacy of  
597 synaptic inhibition depends on multiple, dynamically interacting mechanisms  
598 implicated in chloride homeostasis. *PLoS computational biology* **7**, e1002149.
- 599 Duarte ST, Armstrong J, Roche A, Orteza C, Perez A, O'Callaghan Mdel M, Pereira A, Sanmarti  
600 F, Ormazabal A, Artuch R, Pineda M & Garcia-Cazorla A. (2013). Abnormal expression

- 601 of cerebrospinal fluid cation chloride cotransporters in patients with Rett syndrome.  
602 *PloS one* **8**, e68851.
- 603 Freund TF & Antal M. (1988). GABA-containing neurons in the septum control inhibitory  
604 interneurons in the hippocampus. *Nature* **336**, 170-173.
- 605 Friedel P, Kahle KT, Zhang J, Hertz N, Pisella LI, Buhler E, Schaller F, Duan J, Khanna AR,  
606 Bishop PN, Shokat KM & Medina I. (2015). WNK1-regulated inhibitory  
607 phosphorylation of the KCC2 cotransporter maintains the depolarizing action of  
608 GABA in immature neurons. *Sci Signal* **8**, ra65.
- 609 Gan J, Weng SM, Pernia-Andrade AJ, Csicsvari J & Jonas P. (2017). Phase-Locked Inhibition,  
610 but Not Excitation, Underlies Hippocampal Ripple Oscillations in Awake Mice In Vivo.  
611 *Neuron* **93**, 308-314.
- 612 Gao B & Fritschy JM. (1994). Selective allocation of GABAA receptors containing the alpha 1  
613 subunit to neurochemically distinct subpopulations of rat hippocampal interneurons.  
614 *The European journal of neuroscience* **6**, 837-853.
- 615 Gauvain G, Chamma I, Chevy Q, Cabezas C, Irinopoulou T, Bodrug N, Carnaud M, Levi S &  
616 Poncer JC. (2011). The neuronal K-Cl cotransporter KCC2 influences postsynaptic  
617 AMPA receptor content and lateral diffusion in dendritic spines. *Proceedings of the*  
618 *National Academy of Sciences of the United States of America* **108**, 15474-15479.
- 619 Gielen M, Thomas P & Smart TG. (2015). The desensitization gate of inhibitory Cys-loop  
620 receptors. *Nature communications* **6**, 6829.
- 621 Goutierre M, Al Awabdh S, Donneger F, Francois E, Gomez-Dominguez D, Irinopoulou T,  
622 Menendez de la Prida L & Poncer JC. (2019). KCC2 Regulates Neuronal Excitability and  
623 Hippocampal Activity via Interaction with Task-3 Channels. *Cell reports* **28**, 91-  
624 103.e107.
- 625 Gulyas AI, Hajos N & Freund TF. (1996). Interneurons containing calretinin are specialized to  
626 control other interneurons in the rat hippocampus. *The Journal of neuroscience : the*  
627 *official journal of the Society for Neuroscience* **16**, 3397-3411.

- 628 Gulyas AI, Megias M, Emri Z & Freund TF. (1999). Total number and ratio of excitatory and  
629 inhibitory synapses converging onto single interneurons of different types in the CA1  
630 area of the rat hippocampus. *The Journal of neuroscience : the official journal of the*  
631 *Society for Neuroscience* **19**, 10082-10097.
- 632 Gulyas AI, Sik A, Payne JA, Kaila K & Freund TF. (2001). The KCl cotransporter, KCC2, is highly  
633 expressed in the vicinity of excitatory synapses in the rat hippocampus. *The European*  
634 *journal of neuroscience* **13**, 2205-2217.
- 635 Hartig W, Brauer K & Bruckner G. (1992). Wisteria floribunda agglutinin-labelled nets  
636 surround parvalbumin-containing neurons. *Neuroreport* **3**, 869-872.
- 637 Henze DA & Buzsaki G. (2001). Action potential threshold of hippocampal pyramidal cells in  
638 vivo is increased by recent spiking activity. *Neuroscience* **105**, 121-130.
- 639 Heubl M, Zhang J, Pressey JC, Al Awabdh S, Renner M, Gomez-Castro F, Moutkine I, Eugène  
640 E, Russeau M, Kahle KT, Poncer JC & Lévi S. (2017). GABAA receptor dependent  
641 synaptic inhibition rapidly tunes KCC2 activity via the Cl<sup>-</sup>-sensitive WNK1 kinase.  
642 *Nature communications* **8**, 1776.
- 643 Hu H, Gan J & Jonas P. (2014). Interneurons. Fast-spiking, parvalbumin(+) GABAergic  
644 interneurons: from cellular design to microcircuit function. *Science* **345**, 1255263.
- 645 Huberfeld G, Wittner L, Clemenceau S, Baulac M, Kaila K, Miles R & Rivera C. (2007).  
646 Perturbed chloride homeostasis and GABAergic signaling in human temporal lobe  
647 epilepsy. *The Journal of neuroscience : the official journal of the Society for*  
648 *Neuroscience* **27**, 9866-9873.
- 649 Ivakine EA, Acton BA, Mahadevan V, Ormond J, Tang M, Pressey JC, Huang MY, Ng D, Delpire  
650 E, Salter MW, Woodin MA & McInnes RR. (2013). Neto2 is a KCC2 interacting protein  
651 required for neuronal Cl<sup>-</sup> regulation in hippocampal neurons. *Proceedings of the*  
652 *National Academy of Sciences of the United States of America* **110**, 3561-3566.
- 653 Jedlicka P, Deller T, Gutkin BS & Backus KH. (2011). Activity-dependent intracellular chloride  
654 accumulation and diffusion controls GABA(A) receptor-mediated synaptic  
655 transmission. *Hippocampus* **21**, 885-898.

- 656 Jones MV & Westbrook GL. (1995). Desensitized states prolong GABAA channel responses to  
657 brief agonist pulses. *Neuron* **15**, 181-191.
- 658 Jones MV & Westbrook GL. (1996). The impact of receptor desensitization on fast synaptic  
659 transmission. *Trends in neurosciences* **19**, 96-101.
- 660 Kaila K, Lamsa K, Smirnov S, Taira T & Voipio J. (1997). Long-lasting GABA-mediated  
661 depolarization evoked by high-frequency stimulation in pyramidal neurons of rat  
662 hippocampal slice is attributable to a network-driven, bicarbonate-dependent K<sup>+</sup>  
663 transient. *The Journal of neuroscience : the official journal of the Society for*  
664 *Neuroscience* **17**, 7662-7672.
- 665 Karlocai MR, Wittner L, Toth K, Magloczky Z, Katarova Z, Rasonyi G, Eross L, Czirjak S, Halasz  
666 P, Szabo G, Payne JA, Kaila K & Freund TF. (2016). Enhanced expression of potassium-  
667 chloride cotransporter KCC2 in human temporal lobe epilepsy. *Brain structure &*  
668 *function* **221**, 3601-3615.
- 669 Kelley MR, Cardarelli RA, Smalley JL, Ollerhead TA, Andrew PM, Brandon NJ, Deeb TZ & Moss  
670 SJ. (2018). Locally Reducing KCC2 Activity in the Hippocampus is Sufficient to Induce  
671 Temporal Lobe Epilepsy. *EBioMedicine* **32**, 62-71.
- 672 Khirug S, Yamada J, Afzalov R, Voipio J, Khiroug L & Kaila K. (2008). GABAergic depolarization  
673 of the axon initial segment in cortical principal neurons is caused by the Na-K-2Cl  
674 cotransporter NKCC1. *The Journal of neuroscience : the official journal of the Society*  
675 *for Neuroscience* **28**, 4635-4639.
- 676 Kim Y & Trussell LO. (2007). Ion channels generating complex spikes in cartwheel cells of the  
677 dorsal cochlear nucleus. *Journal of neurophysiology* **97**, 1705-1725.
- 678 Kirmse K, Kummer M, Kovalchuk Y, Witte OW, Garaschuk O & Holthoff K. (2015). GABA  
679 depolarizes immature neurons and inhibits network activity in the neonatal  
680 neocortex in vivo. *Nature communications* **6**, 7750.
- 681 Klausberger T & Somogyi P. (2008). Neuronal diversity and temporal dynamics: the unity of  
682 hippocampal circuit operations. *Science* **321**, 53-57.

- 683 Kourdougli N, Pellegrino C, Renko JM, Khirug S, Chazal G, Kukko-Lukjanov TK, Lauri SE,  
684 Gaiarsa JL, Zhou L, Peret A, Castren EP, Tuominen RKP, Crepel V & Rivera CP. (2017).  
685 Depolarizing GABA contributes to glutamatergic network rewiring in epilepsy. *Annals*  
686 *of neurology* **81**, 251-265.
- 687 Li H, Khirug S, Cai C, Ludwig A, Blaesse P, Kolikova J, Afzalov R, Coleman SK, Lauri S,  
688 Airaksinen MS, Keinanen K, Khiroug L, Saarma M, Kaila K & Rivera C. (2007). KCC2  
689 interacts with the dendritic cytoskeleton to promote spine development. *Neuron* **56**,  
690 1019-1033.
- 691 Llano I & Marty A. (1995). Presynaptic metabotropic glutamatergic regulation of inhibitory  
692 synapses in rat cerebellar slices. *The Journal of physiology* **486 ( Pt 1)**, 163-176.
- 693 Llano O, Smirnov S, Soni S, Golubtsov A, Guillemain I, Hotulainen P, Medina I, Nothwang HG,  
694 Rivera C & Ludwig A. (2015). KCC2 regulates actin dynamics in dendritic spines via  
695 interaction with beta-PIX. *The Journal of cell biology* **209**, 671-686.
- 696 Lozovaya N, Nardou R, Tyzio R, Chiesa M, Pons-Bennaceur A, Eftekhari S, Bui TT, Billon-Grand  
697 M, Rasero J, Bonifazi P, Guimond D, Gaiarsa JL, Ferrari DC & Ben-Ari Y. (2019). Early  
698 alterations in a mouse model of Rett syndrome: the GABA developmental shift is  
699 abolished at birth. *Scientific reports* **9**, 9276.
- 700 MacKenzie G & Maguire J. (2015). Chronic stress shifts the GABA reversal potential in the  
701 hippocampus and increases seizure susceptibility. *Epilepsy research* **109**, 13-27.
- 702 Magloire V, Cornford J, Lieb A, Kullmann DM & Pavlov I. (2019). KCC2 overexpression  
703 prevents the paradoxical seizure-promoting action of somatic inhibition. *Nature*  
704 *communications* **10**, 1225.
- 705 Mahadevan V, Pressey JC, Acton BA, Uvarov P, Huang MY, Chevrier J, Puchalski A, Li CM,  
706 Ivakine EA, Airaksinen MS, Delpire E, McInnes RR & Woodin MA. (2014). Kainate  
707 receptors coexist in a functional complex with KCC2 and regulate chloride  
708 homeostasis in hippocampal neurons. *Cell reports* **7**, 1762-1770.
- 709 Markkanen M, Karhunen T, Llano O, Ludwig A, Rivera C, Uvarov P & Airaksinen MS. (2014).  
710 Distribution of neuronal KCC2a and KCC2b isoforms in mouse CNS. *The Journal of*  
711 *comparative neurology* **522**, 1897-1914.



- 712 Marty A & Neher E. (1995). Tight-Seal Whole-Cell Recording. In *Single-Channel Recording*, ed.  
713 Sakmann B & Neher E, pp. 31-52. Springer US, Boston, MA.
- 714 Mason MJ, Simpson AK, Mahaut-Smith MP & Robinson HP. (2005). The interpretation of  
715 current-clamp recordings in the cell-attached patch-clamp configuration. *Biophysical*  
716 *journal* **88**, 739-750.
- 717 Meijering E, Jacob M, Sarria JC, Steiner P, Hirling H & Unser M. (2004). Design and validation  
718 of a tool for neurite tracing and analysis in fluorescence microscopy images.  
719 *Cytometry Part A : the journal of the International Society for Analytical Cytology* **58**,  
720 167-176.
- 721 Norenberg A, Hu H, Vida I, Bartos M & Jonas P. (2010). Distinct nonuniform cable properties  
722 optimize rapid and efficient activation of fast-spiking GABAergic interneurons.  
723 *Proceedings of the National Academy of Sciences of the United States of America* **107**,  
724 894-899.
- 725 Palma E, Amici M, Sobrero F, Spinelli G, Di Angelantonio S, Ragazzino D, Mascia A, Scoppetta  
726 C, Esposito V, Miledi R & Eusebi F. (2006). Anomalous levels of Cl<sup>-</sup> transporters in the  
727 hippocampal subiculum from temporal lobe epilepsy patients make GABA excitatory.  
728 *Proceedings of the National Academy of Sciences of the United States of America* **103**,  
729 8465-8468.
- 730 Papke D, Gonzalez-Gutierrez G & Grosman C. (2011). Desensitization of neurotransmitter-  
731 gated ion channels during high-frequency stimulation: a comparative study of Cys-  
732 loop, AMPA and purinergic receptors. *The Journal of physiology* **589**, 1571-1585.
- 733 Patenaude C, Massicotte G & Lacaille JC. (2005). Cell-type specific GABA synaptic  
734 transmission and activity-dependent plasticity in rat hippocampal stratum radiatum  
735 interneurons. *The European journal of neuroscience* **22**, 179-188.
- 736 Perkins KL. (2006). Cell-attached voltage-clamp and current-clamp recording and stimulation  
737 techniques in brain slices. *Journal of neuroscience methods* **154**, 1-18.
- 738 Pouille F & Scanziani M. (2001). Enforcement of temporal fidelity in pyramidal cells by  
739 somatic feed-forward inhibition. *Science* **293**, 1159-1163.

- 740 Rivera C, Voipio J, Payne JA, Ruusuvuori E, Lahtinen H, Lamsa K, Pirvola U, Saarma M & Kaila  
741 K. (1999). The K<sup>+</sup>/Cl<sup>-</sup> co-transporter KCC2 renders GABA hyperpolarizing during  
742 neuronal maturation. *Nature* **397**, 251-255.
- 743 Sauer JF & Bartos M. (2010). Recruitment of early postnatal parvalbumin-positive  
744 hippocampal interneurons by GABAergic excitation. *The Journal of neuroscience : the*  
745 *official journal of the Society for Neuroscience* **30**, 110-115.
- 746 Simat M, Ambrosetti L, Lardi-Studler B & Fritschy JM. (2007). GABAergic synaptogenesis  
747 marks the onset of differentiation of basket and stellate cells in mouse cerebellum.  
748 *The European journal of neuroscience* **26**, 2239-2256.
- 749 Solbach S & Celio MR. (1991). Ontogeny of the calcium binding protein parvalbumin in the  
750 rat nervous system. *Anatomy and embryology* **184**, 103-124.
- 751 Staley KJ & Mody I. (1992). Shunting of excitatory input to dentate gyrus granule cells by a  
752 depolarizing GABAA receptor-mediated postsynaptic conductance. *Journal of*  
753 *neurophysiology* **68**, 197-212.
- 754 Staley KJ & Proctor WR. (1999). Modulation of mammalian dendritic GABA(A) receptor  
755 function by the kinetics of Cl<sup>-</sup> and HCO<sub>3</sub><sup>-</sup> transport. *The Journal of physiology* **519 Pt**  
756 **3**, 693-712.
- 757 Takacs VT, Klausberger T, Somogyi P, Freund TF & Gulyas AI. (2012). Extrinsic and local  
758 glutamatergic inputs of the rat hippocampal CA1 area differentially innervate  
759 pyramidal cells and interneurons. *Hippocampus* **22**, 1379-1391.
- 760 Tang X, Kim J, Zhou L, Wengert E, Zhang L, Wu Z, Carromeu C, Muotri AR, Marchetto MC,  
761 Gage FH & Chen G. (2016). KCC2 rescues functional deficits in human neurons  
762 derived from patients with Rett syndrome. *Proceedings of the National Academy of*  
763 *Sciences of the United States of America* **113**, 751-756.
- 764 Thompson SM & Gahwiler BH. (1989a). Activity-dependent disinhibition. I. Repetitive  
765 stimulation reduces IPSP driving force and conductance in the hippocampus in vitro.  
766 *Journal of neurophysiology* **61**, 501-511.

- 767 Thompson SM & Gahwiler BH. (1989b). Activity-dependent disinhibition. II. Effects of  
768 extracellular potassium, furosemide, and membrane potential on ECl<sup>-</sup> in hippocampal  
769 CA3 neurons. *Journal of neurophysiology* **61**, 512-523.
- 770 Thompson SM & Gahwiler BH. (1989c). Activity-dependent disinhibition. III. Desensitization  
771 and GABAB receptor-mediated presynaptic inhibition in the hippocampus in vitro.  
772 *Journal of neurophysiology* **61**, 524-533.
- 773 Tyzio R, Nardou R, Ferrari DC, Tsintsadze T, Shahrokhi A, Eftekhari S, Khalilov I, Tsintsadze V,  
774 Brouchoud C, Chazal G, Lemonnier E, Lozovaya N, Burnashev N & Ben-Ari Y. (2014).  
775 Oxytocin-mediated GABA inhibition during delivery attenuates autism pathogenesis  
776 in rodent offspring. *Science* **343**, 675-679.
- 777 Uvarov P, Ludwig A, Markkanen M, Pruunsild P, Kaila K, Delpire E, Timmusk T, Rivera C &  
778 Airaksinen MS. (2007). A novel N-terminal isoform of the neuron-specific K-Cl  
779 cotransporter KCC2. *The Journal of biological chemistry* **282**, 30570-30576.
- 780 Verheugen JA, Fricker D & Miles R. (1999). Noninvasive measurements of the membrane  
781 potential and GABAergic action in hippocampal interneurons. *The Journal of*  
782 *neuroscience : the official journal of the Society for Neuroscience* **19**, 2546-2555.
- 783 Zucker RS & Regehr WG. (2002). Short-term synaptic plasticity. *Annu Rev Physiol* **64**, 355-  
784 405.
- 785
- 786

787 **Acknowledgements**

788 We thank X. Marques for expert assistance with confocal imaging, which was performed at  
789 the “Photonic Imaging and Image Analysis Platform” of the Institut du Fer à Moulin. We also  
790 thank Peter Blaesse for critical reading of the manuscript.

791

792 **Competing interests**

793 The authors declare no conflict of interest.

794

795

796 **Author contributions**

797 Y.O. and J.C.P. conceived and designed the research. Y.O. performed all electrophysiological  
798 recordings and data analysis with help of E.J.S. who also maintained the mouse colony. F.D.  
799 performed immunohistochemistry, confocal imaging and analysis. Y.O and J.C.P. prepared  
800 the figures and wrote the paper. All authors approved the final version of the manuscript  
801 and agree to be accountable for all aspects of the work in ensuring that questions related to  
802 the accuracy or integrity of any part of the work are appropriately investigated and resolved.  
803 All persons designated as authors qualify for authorship, and all those who qualify for  
804 authorship are listed.

805

806

807 **Funding**

808 This work was supported by the Institut National de la Santé et de la Recherche Médicale,  
809 Sorbonne Université, LabEx Bio-Psy through the *Investissements d'Avenir* program managed  
810 by Agence Nationale de La Recherche under reference ANR-11-IDEX-0004-02 (postdoctoral  
811 fellowship to YO), Fondation pour la Recherche Médicale (grant DEQ20140329539 to JCP),  
812 Fédération pour la Recherche sur le Cerveau and Fondation Française pour la Recherche sur  
813 l'Épilepsie (grants to JCP) as well as ERANET-Neuron (ACRoBAT project, funded by Agence  
814 Nationale pour la Recherche to JCP). FD is the recipient of a doctoral fellowship from  
815 Sorbonne Université. The Poncer lab is affiliated with the Paris School of Neuroscience (ENP)  
816 and the Bio-Psy Laboratory of excellence.

817

818 **Figures and legends**

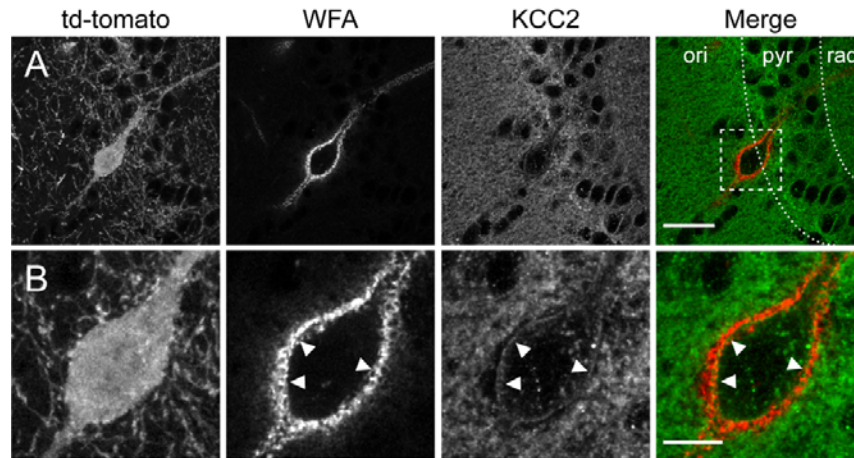

819

820 **Figure 1. KCC2 labeling of hippocampal CA1 parvalbumin interneurons.**

821 A, Representative micrograph (maximum projection of 10 confocal sections over 2.6  $\mu\text{m}$ ) of  
822 area CA1 of an adult *Pvalb*<sup>tm1<sup>(cre)</sup>Arbr/J</sup>::*Ai14* mouse hippocampal section immunostained for  
823 KCC2 (green) and WFA lectin (red), showing td-tomato expression in a PV IN surrounded by  
824 WFA staining on the soma and proximal dendrites. Scale, 30  $\mu\text{m}$ . B, Magnified region boxed  
825 in A, showing KCC2 immunostaining in td-tomato expressing PV IN lies just underneath the  
826 perineuronal net stained with WFA (arrowheads). Scale, 10  $\mu\text{m}$ .

827

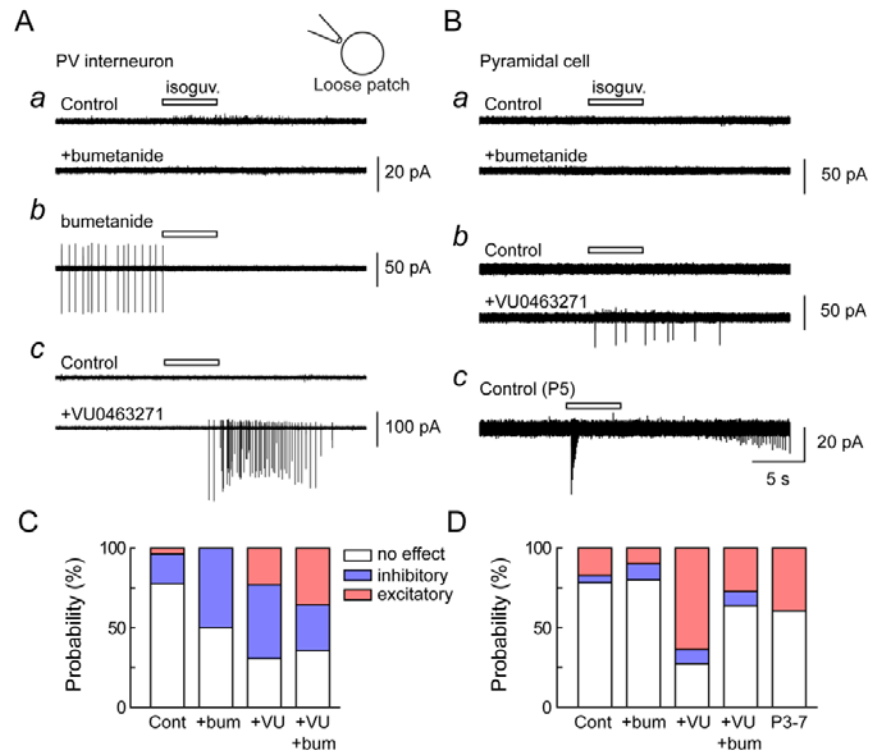

828

829 **Figure 2. Excitatory and inhibitory actions of GABAA receptor activation in CA1**  
830 **parvalbumin interneurons and pyramidal cells.**

831 A *a*, Representative sections of recordings in loose patch mode of a CA1 PV IN upon brief,  
832 focal somatic application of isoguvacine (100  $\mu$ M, white bar), before and during application  
833 of the NKCC1 antagonist bumetanide (10  $\mu$ M). *b*, same as in *a* in another PV IN during  
834 bumetanide application. *c*, same as in *a* and *b*, before and during application of the KCC2  
835 antagonist VU0463271 (10  $\mu$ M). B *a* and *b*, recordings as in A *a* and *c* from CA1 PCs in P30-  
836 P40 mice. *c*, recording showing the effect of somatic isoguvacine application on a CA1 PC  
837 from a P5 mouse. C, summary graph showing the proportions of each type response  
838 (excitatory, inhibitory or none) recorded upon isoguvacine application in PV INs. D, Same as  
839 C for recordings from PCs.

840

841

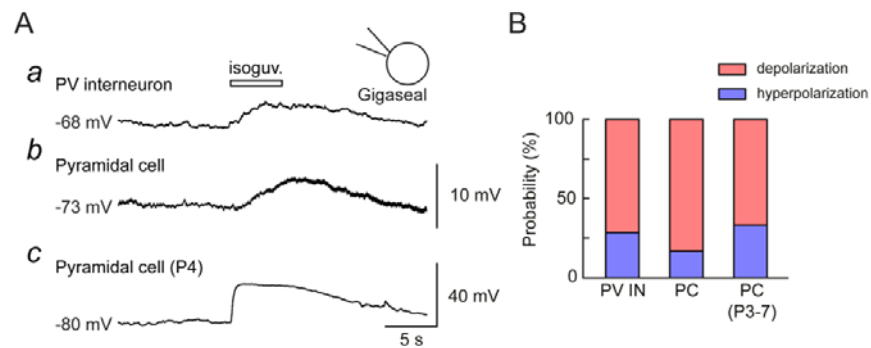

842

843 **Figure 3. Polarity of GABAAR-mediated potentials in CA1 parvalbumin interneurons and**  
844 **pyramidal cells.**

845 A, Representative sections of recordings in gigaseal patch mode of a CA1 PV IN from a P46  
846 mouse (a) and a PC from a P33 (b) or P4 (c) mouse upon brief, focal somatic application of  
847 isoguvacine (100  $\mu$ M, white bar). B, summary graph showing the proportions of each type of  
848 response (depolarizing, hyperpolarizing) recorded upon isoguvacine application in each cell  
849 type.

850

851

852

853

854

855

856

857



858

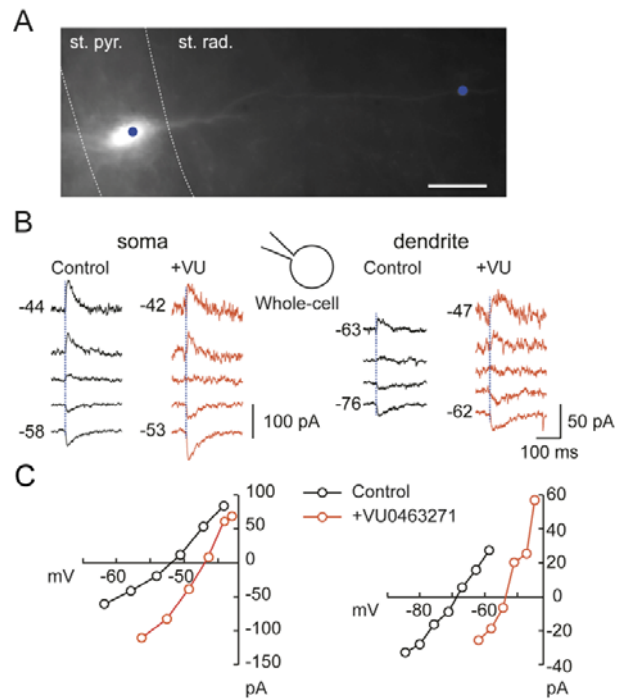

859

860 **Figure 4. Contribution of KCC2 to transmembrane chloride extrusion in a CA1 parvalbumin**  
861 **interneuron.**

862 A, Fluorescence micrograph of a CA1 PV IN from a P37 mouse hippocampal slice, recorded in  
863 whole-cell mode and filled with Alex594. The blue spots represent the position and size of  
864 the laser beam used for focal RubiGABA photolysis. Scale, 20 μm. B, Currents evoked at  
865 varying potentials by focal somatic (left) or dendritic (right) photolysis of RubiGABA in the  
866 cell shown in A, before (black) and during (red) application of VU0463271 (10 μM). Numbers  
867 of the right represent holding potentials corrected for liquid junction potential and voltage  
868 drop across the pipette resistance. C, Current-voltage relations from recordings shown in B  
869 showing the different reversal potentials of RubiGABA-evoked currents in the soma vs.  
870 dendrites and their depolarizing shift upon KCC2 blockade.

871

872

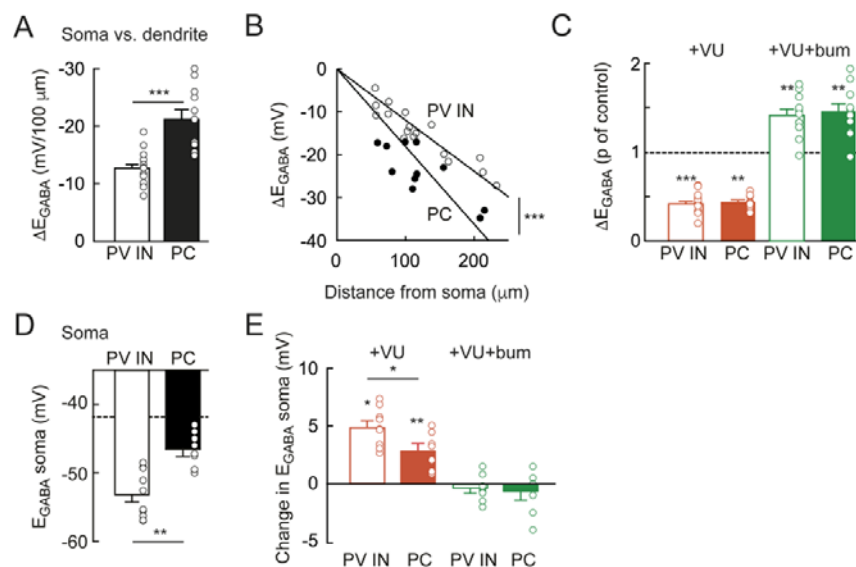

873

874 **Figure 5. Compared contribution of KCC2 and NKCC1 to somato-dendritic chloride**  
875 **gradients in CA1 parvalbumin interneuron and pyramidal cells.**

876 A, Summary graph showing  $E_{GABA}$  somatodendritic gradient ( $\Delta E_{GABA}$ ) between soma and  
877 dendrites normalized by the distance from soma to dendritic photolysis locations. PV IN:  
878 n=17 dendritic sites in 9 cells. PC: n=11 dendritic sites in 8 cells. \*\*\* Mann Whitney test  
879  $p < 0.001$ . B, somatodendritic  $E_{GABA}$  gradient plotted against the distance from soma to  
880 dendritic photolysis locations with superimposed linear regression, showing steeper relation  
881 in PCs compared with PV INs. Same data as in A, \*\*\* Multiple regression test  $p < 0.001$ . C,  
882 Change in  $\Delta E_{GABA}$  upon sequential KCC2 (red) and KCC2+NKCC1 blockade (green) by  
883 VU0463271 and bumetanide, respectively. The values are normalized to those of the  
884 preceding condition (control for VU0463271, VU0463271 for VU0463271+bumetanide). \*\*  
885 and \*\*\* Wilcoxon signed-rank test  $p < 0.01$  and  $0.001$ , respectively. No significant difference  
886 was observed in PC vs PV INs. Same recordings as in A and B. D, Reversal potential ( $E_{GABA}$ ) of  
887 currents evoked by somatic RubiGABA uncaging in PV INs and PCs. Same data as in A-C.

888 Dashed line: estimated  $E_{Cl}$  based on Nernst equation. \*\* Mann Whitney test  $p < 0.01$ . E,  
889 Change in somatic  $E_{GABA}$  upon sequential KCC2 (red) and KCC2+NKCC1 blockade (green) by  
890 VU0463271 and bumetanide, respectively. The values are normalized to those of the  
891 preceding condition (control for VU0463271, VU0463271 for VU0463271+bumetanide).  
892 VU0463271 depolarized  $E_{GABA}$  more in PV INs than in PCs. However, further addition of  
893 bumetanide had no significant effect. \* and \*\* Wilcoxon rank signed-rank test  $p < 0.05$  and  
894 0.01, respectively. \* for PV INs vs PCs, Mann Whitney test  $p < 0.05$ .

895

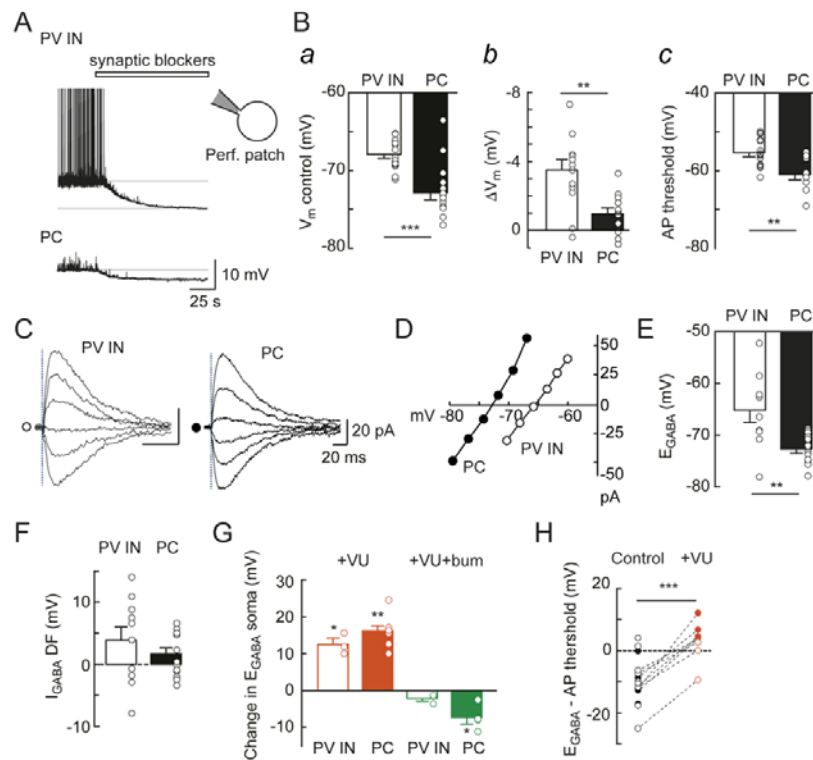

896

897 **Figure 6. Compared reversal potential and driving force of GABA currents in CA1**  
 898 **parvalbumin interneurons and pyramidal cells.**

899 A, Representative current clamp recordings from a CA1 PV IN (top ) and PC (bottom) in  
 900 gramicidin-perforated patch mode, showing the effect of synaptic receptor antagonists  
 901 (APV, NBQX and CGP55845) and TTX (white bar) on holding potential. Note that the PV IN  
 902 but not the PC shows spontaneous firing prior to application of the blockers. B, *a*, resting  
 903 membrane potential measured in 15 CA1 PV INs and 15 PCs prior to application of synaptic  
 904 blockers. \*\*\*, Mann Whitney test  $p < 0.001$ . *b*, change in membrane potential ( $\Delta V_m$ ) upon  
 905 application of synaptic blockers in the same cells as in *a*. \*\*, Mann Whitney test  $p < 0.01$ . *c*,  
 906 Action potential threshold measured in spontaneously firing PV INs ( $n=15$ ) and PCs ( $n=9$ ). \*\*,  
 907 Mann Whitney test  $p < 0.01$ . C, Currents evoked at varying potentials by focal somatic  
 908 photolysis of RubiGABA in a PV IN (left) and a PC (right). The dotted line represents the

909 timing of photolysis. D, corresponding current/voltage relation for the recordings shown in  
910 C. Open circles, PV IN. Filled circles, PC. E, Summary graphs showing the reversal potential of  
911 somatically evoked GABAAR-mediated currents in 10 CA1 PV INs and 16 PCs. \*\*, Mann  
912 Whitney test  $p < 0.01$ . F, estimated driving force of somatic GABAAR-mediated currents  
913 computed by subtracting  $V_m$  from  $E_{GABA}$ , showing GABAARs have slightly depolarizing actions  
914 in both PV INs and PCs. G, summary graph showing the change in somatic  $E_{GABA}$  upon  
915 sequential KCC2 (red) and KCC2+NKCC1 blockade (green) by VU0463271 and bumetanide,  
916 respectively. The values are normalized to those of the preceding condition (control for  
917 VU0463271, VU0463271 for VU0463271+bumetanide). Addition of bumetanide after  
918 VU0463271 had no significant effect on somatic  $E_{GABA}$  in either PV INs ( $n=3$ ) or PCs ( $n=4$ ). \*,  
919 paired t-test,  $p < 0.05$ ; \*\*, Wilcoxon signed rank test,  $p < 0.01$ . H, Difference between  $E_{GABA}$  and  
920 firing threshold for PV INs (open circles) and PCs (filled circles), before (black) and during  
921 (red) application of VU0463271. Dotted lines represent paired data used for statistical  
922 comparison (all cells pooled). \*\*\*, Paired t-test,  $p < 0.001$ .

923

924

925

926

927

928

929

930

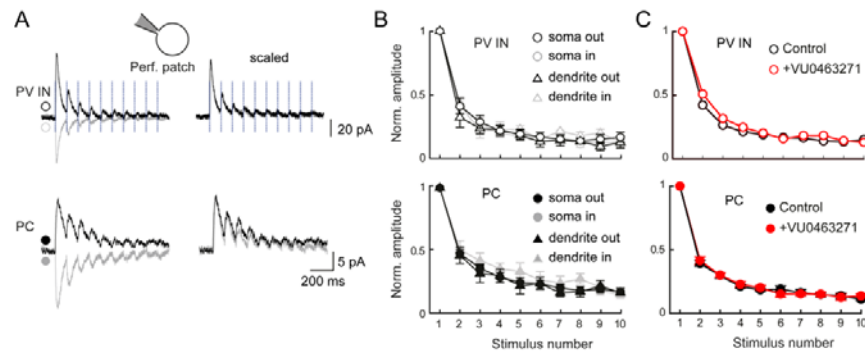

931

932 **Figure 7. Dynamics of GABAAR-mediated currents in CA1 parvalbumin interneurons and**  
933 **pyramidal cells.**

934 A, Representative recordings of currents evoked by 10 Hz somatic photolysis of RubiGABA in  
935 a CA1 PV IN and a PC recorded in gramicidin-perforated patch mode and held at potentials  
936 above (black) or below (grey)  $E_{GABA}$  (PV IN: -60 and -80 mV; PC: -60 and -77 mV). B, Summary  
937 graphs showing peak current amplitudes normalized to the peak amplitude of the first  
938 current, during a train of RubiGABA photolysis on the soma (circles) or dendrites (triangles)  
939 of PV INs (soma: n=6, dendrites: n=3, open symbols) and PCs (soma: n=11, dendrites: n=4,  
940 filled symbols). C, Same as in B showing the lack of effect of VU0463271 (10  $\mu$ M, red  
941 symbols) on the decay of the peak amplitude of GABAAR-mediated currents during a 10 Hz  
942 somatic RubiGABA photolysis (PV INs, n=2; PCs, n=4).

943

944

945

946

947
